# Supplementary material
Source: MDPI journal article supplement (https://www.mdpi.com/1424-8247/16/1/48)
Supplement: s1 [file s1]

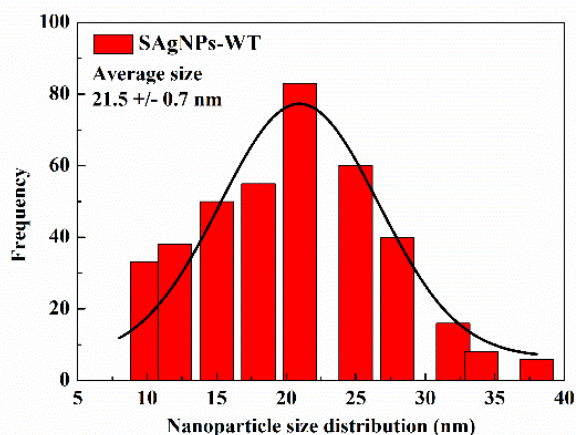

**Figure S1a.** SAgNPs-WT distribution with N=389

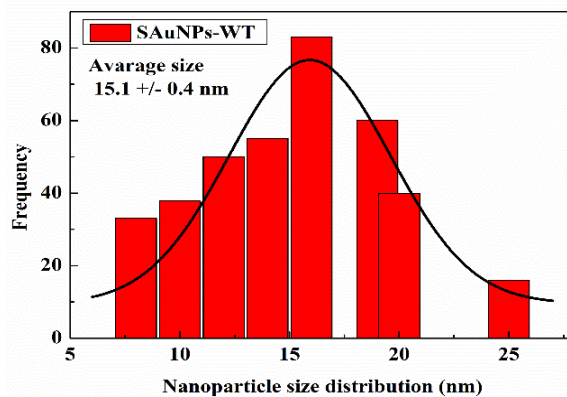

**Figure S1b.** SAuNPs-WT distribution with N=375

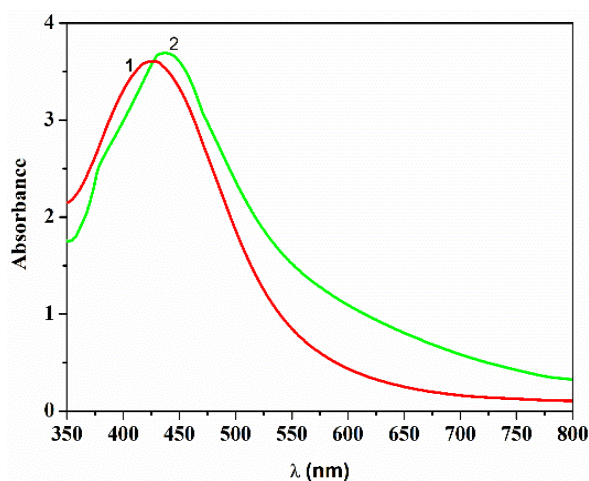

**Figure S2.** UV-VIS spectra of: 1. Initial colloidal solution with SAgNPs-WT; 2. after one year of store at room temperature protected from light

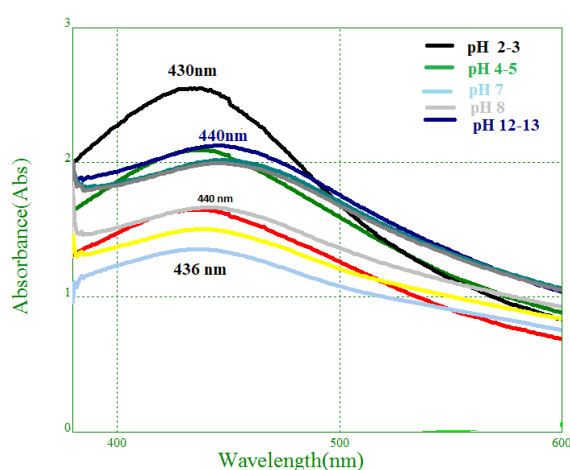

**Figure S3.** UV-Vis spectra showing the effect of varying pH on stability of SAgNPs-WT. The inset photo shows the change in color with different pH correspond to absorption spectra of the gold nanoparticles

**Table S1.** FT-IR possible assignments of the colloidal solution (dehydrated) of SAgNPs-WT

| Possible assignments | Possible chemical compounds          | Wavenumber (cm <sup>-1</sup> ) |                         |                          |                            |
|----------------------|--------------------------------------|--------------------------------|-------------------------|--------------------------|----------------------------|
|                      |                                      | Willow extract                 | SAgNPs-WT (after 1 day) | SAgNPs-WT (after 7 days) | SAgNPs-WT (after 180 days) |
| O-H, $\nu$           | Alcohols and phenols hydroxyl groups | 3306                           | 3259                    | 3275                     | 3271                       |
| =C-H, $\nu$          | Aromatic ring                        | 3022                           | 3012                    | 3013                     | 3013                       |
| -C-H, $\nu$          | Aliphatic groups                     | 2980                           | 2976                    | 2978                     | 2978                       |
| -C-H, $\nu$          | Aliphatic groups                     | 2915                           | 2913                    | 2919                     | 2917                       |
| C=O, $\nu$           | Carbonyl groups                      | 1725                           | 1710                    | -                        | -                          |
| C=O+ C=C, $\nu$      | C=O conjugated to the aromatic ring  | 1602                           | 1604                    | 1626                     | 1616                       |
| C=C, $\nu$           | Aromatic skeletal                    | 1516                           | 1519                    | 1523                     | 1521                       |
| -C-H, $\delta$       | Aliphatic groups                     | 1444                           | -                       | -                        | -                          |
| C-O, $\nu$           | Phenols compounds                    | 1395                           | 1397                    | 1399                     | 1397                       |
| C-O, $\nu$           | Guaiacol and syringyl rings          | 1240                           | 1261                    | 1262                     | 1260                       |
| C-O, $\delta$        | Alcohols or aliphatic ethers         | 1036                           | 1024                    | 1023                     | 1020                       |
| C-H, $\delta$        | Aromatic ring                        | 818                            | 818                     | 802                      | 819                        |
| C-H, $\delta$        | Aromatic ring                        | 773                            | -                       | -                        | -                          |
| C-H, $\delta$        | Aliphatic groups                     | 736                            | -                       | -                        | -                          |
| C-H, $\delta$        | Aliphatic groups                     | 610                            | -                       | -                        | -                          |
| O-H, $\delta$        | Alcohols and phenols hydroxyl groups | 514                            | -                       | -                        | -                          |

*Note:  $\nu$  - stretching and  $\delta$  - bending vibrations*

**Table S2.** FT-IR possible assignments of the hydrogels based by CS/G and SAgNPs-WT

| Possible bond assignments | From...                    | Wavenumber (cm <sup>-1</sup> ) |              |             |
|---------------------------|----------------------------|--------------------------------|--------------|-------------|
|                           |                            | Gelatin<br>a                   | Chitosa<br>n | Ag-Hydrogel |
| N-H+O-H, $\nu+\nu$        | Amida A groups             | 3273                           | 3269         | 3297        |
| =C-H, $\nu$               | Alkenyl groups             | 3078                           | -            | 3077        |
| C-H, $\nu$                | Amida B groups             | 2938                           | 2935         | 2919        |
| C-H, $\nu$                | Amida B groups             | 2878                           | 2876         | 2873        |
| C=O, $\nu$                | Amida I, N -acetyl groups  | 1634                           | 1638         | 1636        |
| CN+NH, $\nu+\delta$       | Amida II, N -acetyl groups | 1549                           | 1553         | 1543        |
| CH+C-C, $\delta$          | Skeletal                   | 1454                           | -            | 1442        |
| C-O, $\nu$                | Carboxyl groups            | 1404                           | 1408         | 1398        |

|                     |                        |      |      |      |
|---------------------|------------------------|------|------|------|
| C-H, $\delta$       | Aliphatic groups       | -    | 1378 | -    |
| C-N+C-H             | N-acetil groups        | 1336 | 1321 | 1336 |
| CN+NH, $\nu+\delta$ | Amida III groups       | 1280 | -    | -    |
| CN+NH, $\nu+\delta$ | Amida III groups       | 1240 | 1255 | 1237 |
| C-O-C, $\nu$        | Carboxyl groups        | 1203 | -    | 1197 |
| C-O-C, $\nu$        | Carboxyl/ethoxy groups | 1109 | 1152 | 1156 |
| C-O/C-O+C-C, $\nu$  | Carboxyl/ethoxy groups | 1037 | 1027 | 1030 |
| C-H, $\delta$       | Aliphatic groups       | 922  | -    | -    |
| C-H, $\delta$       | Aliphatic groups       | 849  | 851  | -    |
| NH+C-O, $\delta$    | N -acetyl groups       | -    | 557  | -    |

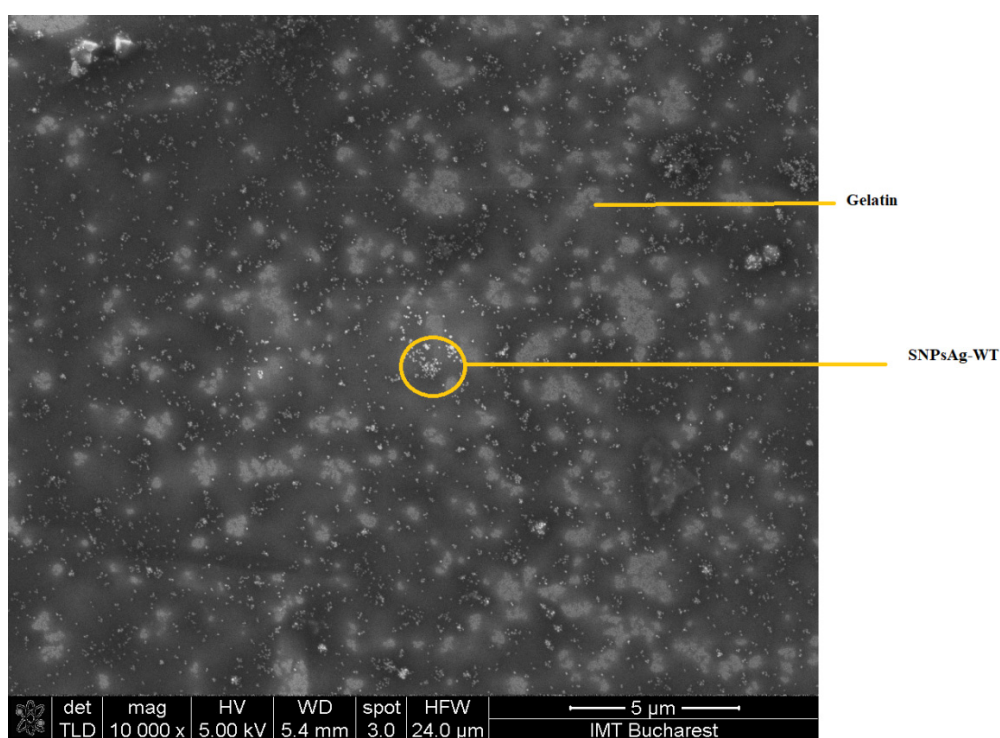

**Figure S4.** SEM image of the Hydrogel based by CS/G and SAgNPs-WT

|   | 1               | 2                                                 | 3                                                    | 4                                                       | 5         | 6         | 7                                                       | 8         | 9         | 10                                                      | 11         | 12         | SAMPLES                       |                                |                                                            |
|---|-----------------|---------------------------------------------------|------------------------------------------------------|---------------------------------------------------------|-----------|-----------|---------------------------------------------------------|-----------|-----------|---------------------------------------------------------|------------|------------|-------------------------------|--------------------------------|------------------------------------------------------------|
|   |                 |                                                   |                                                      |                                                         |           |           |                                                         |           |           |                                                         |            |            | Nanoparticles                 | Hydrogels                      | Ointments (Oint)                                           |
| A | PS<br>200<br>µl | MHB:<br>100 µl<br>PS:<br>50 µl<br>S1-D1:<br>50 µl | MHB:<br>100 µl<br>PS:<br>50 µl<br>Bacteria:<br>50 µl | MHB:<br>100 µl<br>Bacteria:<br>50 µl<br>S1-D1:<br>50 µl | Idem<br>4 | Idem<br>4 | MHB:<br>100 µl<br>Bacteria:<br>50 µl<br>S1-D2:<br>50 µl | Idem<br>7 | Idem<br>7 | MHB:<br>100 µl<br>Bacteria:<br>50 µl<br>S1-D3:<br>50 µl | Idem<br>10 | Idem<br>10 | SAuNP <sub>8</sub> -WT 1S     | Hydrogels<br>Control           | Tween 20                                                   |
| B | PS<br>200<br>µl | MHB:<br>100 µl<br>PS:<br>50 µl<br>S2-D1:<br>50 µl | MHB:<br>100 µl<br>PS:<br>50 µl<br>Bacteria:<br>50 µl | MHB:<br>100 µl<br>Bacteria:<br>50 µl<br>S2-D1:<br>50 µl | Idem<br>4 | Idem<br>4 | MHB:<br>100 µl<br>Bacteria:<br>50 µl<br>S2-D2:<br>50 µl | Idem<br>7 | Idem<br>7 | MHB:<br>100 µl<br>Bacteria:<br>50 µl<br>S2-D3:<br>50 µl | Idem<br>10 | Idem<br>10 | SAuNP <sub>8</sub> -WT 1S     | AgNO <sub>3</sub> +P<br>VP+PEG | Out 1+SAuNP <sub>8</sub> -WT<br>10S+1% tween 20            |
| C | PS<br>200<br>µl | MHB:<br>100 µl<br>PS:<br>50 µl<br>S3-D1:<br>50 µl | MHB:<br>100 µl<br>PS:<br>50 µl<br>Bacteria:<br>50 µl | MHB:<br>100 µl<br>Bacteria:<br>50 µl<br>S3-D1:<br>50 µl | Idem<br>4 | Idem<br>4 | MHB:<br>100 µl<br>Bacteria:<br>50 µl<br>S3-D2:<br>50 µl | Idem<br>7 | Idem<br>7 | MHB:<br>100 µl<br>Bacteria:<br>50 µl<br>S3-D3:<br>50 µl | Idem<br>10 | Idem<br>10 | Salix alba<br>Extract         | Hydrogel A                     | Out 1+SAuNP <sub>8</sub> -WT<br>10S+1% tween 20<br>(1:1:1) |
| D | PS<br>200<br>µl | MHB:<br>100 µl<br>PS:<br>50 µl<br>S4-D1:<br>50 µl | MHB:<br>100 µl<br>PS:<br>50 µl<br>Bacteria:<br>50 µl | MHB:<br>100 µl<br>Bacteria:<br>50 µl<br>S4-D1:<br>50 µl | Idem<br>4 | Idem<br>4 | MHB:<br>100 µl<br>Bacteria:<br>50 µl<br>S4-D2:<br>50 µl | Idem<br>7 | Idem<br>7 | MHB:<br>100 µl<br>Bacteria:<br>50 µl<br>S4-D3:<br>50 µl | Idem<br>10 | Idem<br>10 | Salix alba<br>Extract         | AgNO <sub>3</sub> +P<br>VP+Gly | Out 1+SAuNP <sub>8</sub> -WT<br>10S+1% tween 80<br>(1:1:1) |
| E | PS<br>200<br>µl | MHB:<br>100 µl<br>PS:<br>50 µl<br>S5-D1:<br>50 µl | MHB:<br>100 µl<br>PS:<br>50 µl<br>Bacteria:<br>50 µl | MHB:<br>100 µl<br>Bacteria:<br>50 µl<br>S5-D1:<br>50 µl | Idem<br>4 | Idem<br>4 | MHB:<br>100 µl<br>Bacteria:<br>50 µl<br>S5-D2:<br>50 µl | Idem<br>7 | Idem<br>7 | MHB:<br>100 µl<br>Bacteria:<br>50 µl<br>S5-D3:<br>50 µl | Idem<br>10 | Idem<br>10 | SAuNP <sub>8</sub> -WT 7S     | Hydrogel B                     | Out 2+SAuNP <sub>8</sub> -WT<br>10S+1% tween 80            |
| F | PS<br>200<br>µl | MHB:<br>100 µl<br>PS:<br>50 µl<br>S6-D1:<br>50 µl | MHB:<br>100 µl<br>PS:<br>50 µl<br>Bacteria:<br>50 µl | MHB:<br>100 µl<br>Bacteria:<br>50 µl<br>S6-D1:<br>50 µl | Idem<br>4 | Idem<br>4 | MHB:<br>100 µl<br>Bacteria:<br>50 µl<br>S6-D2:<br>50 µl | Idem<br>7 | Idem<br>7 | MHB:<br>100 µl<br>Bacteria:<br>50 µl<br>S6-D3:<br>50 µl | Idem<br>10 | Idem<br>10 | SAuNP <sub>8</sub> -WT<br>10S | AgNO <sub>3</sub> +P<br>EG_Gly | Out 2+SAuNP <sub>8</sub> -WT<br>10S+1% tween 20<br>(1:1:1) |
| G | PS<br>200<br>µl | MHB:<br>100 µl<br>PS:<br>50 µl<br>S7-D1:<br>50 µl | MHB:<br>100 µl<br>PS:<br>50 µl<br>Bacteria:<br>50 µl | MHB:<br>100 µl<br>Bacteria:<br>50 µl<br>S7-D1:<br>50 µl | Idem<br>4 | Idem<br>4 | MHB:<br>100 µl<br>Bacteria:<br>50 µl<br>S7-D2:<br>50 µl | Idem<br>7 | Idem<br>7 | MHB:<br>100 µl<br>Bacteria:<br>50 µl<br>S7-D3:<br>50 µl | Idem<br>10 | Idem<br>10 | SAuNP <sub>8</sub> -WT 7S     | Hydrogel C                     | Out 2+SAuNP <sub>8</sub> -WT<br>10S+1% tween 80<br>(1:1:1) |
| H | PS<br>200<br>µl | MHB:<br>100 µl<br>PS:<br>50 µl<br>S8-D1:<br>50 µl | MHB:<br>100 µl<br>PS:<br>50 µl<br>Bacteria:<br>50 µl | MHB:<br>100 µl<br>Bacteria:<br>50 µl<br>S8-D1:<br>50 µl | Idem<br>4 | Idem<br>4 | MHB:<br>100 µl<br>Bacteria:<br>50 µl<br>S8-D2:<br>50 µl | Idem<br>7 | Idem<br>7 | MHB:<br>100 µl<br>Bacteria:<br>50 µl<br>S8-D3:<br>50 µl | Idem<br>10 | Idem<br>10 | SAuNP <sub>8</sub> -WT<br>10S | AgNO <sub>3</sub> 1N           | Tween 80                                                   |

Legend: Physiological Serum (PS); Mueller Hinton Broth (MHB); Sample1, 2... (S1, 2...)

Blank
Positive Control
the sample at second dilution
Negative Control

**Figure S5.** The scheme of the plate and the tested samples each on the one plate use for antimicrobial tests

**Table S3.** SIR interpretation of mean inhibition zone diameters in diffusimetric antibiogram for chemicals tested on bacteria

| N  | Chemical<br>o substance<br>tested | Strains type                 |   |   |                         |    |   |                               |   |     | SIR                                                                                        |
|----|-----------------------------------|------------------------------|---|---|-------------------------|----|---|-------------------------------|---|-----|--------------------------------------------------------------------------------------------|
|    |                                   | <i>Staphylococcus aureus</i> |   |   | <i>Escherichia coli</i> |    |   | <i>Pseudomonas aeruginosa</i> |   |     |                                                                                            |
|    |                                   | D0                           | D | E | D0                      | D  | D | D0                            | D | D2  |                                                                                            |
|    |                                   | 1                            | 2 |   | 1                       | 2  |   | 1                             |   |     |                                                                                            |
| 1. | AgNO <sub>3</sub><br>1N           | 24.5                         | 1 | 1 | 20.                     | 12 | 1 | 27.                           | 1 | 13. | Staining of the<br>culture<br>medium at D0<br>and D1<br>Very sensitive<br>on S.a., E.c P.a |
|    |                                   |                              | 6 | 3 | 5                       | .5 | 2 | 5                             | 6 | 5   |                                                                                            |
|    |                                   |                              |   |   |                         |    |   | (M<br>R)                      |   |     |                                                                                            |

Legend: *Staphylococcus aureus* (S.a); *Escherichia coli* (E.c); *Pseudomonas aeruginosa* (P.a)

SIR interpretation: 0 = negative (no antibacterial effect)= Resistant; <10 mm = weak bacterial effect = Intermediate; 10-15 mm = good antibacterial effect = Sensitive; >15 mm = very good antibacterial effect = Very sensitive

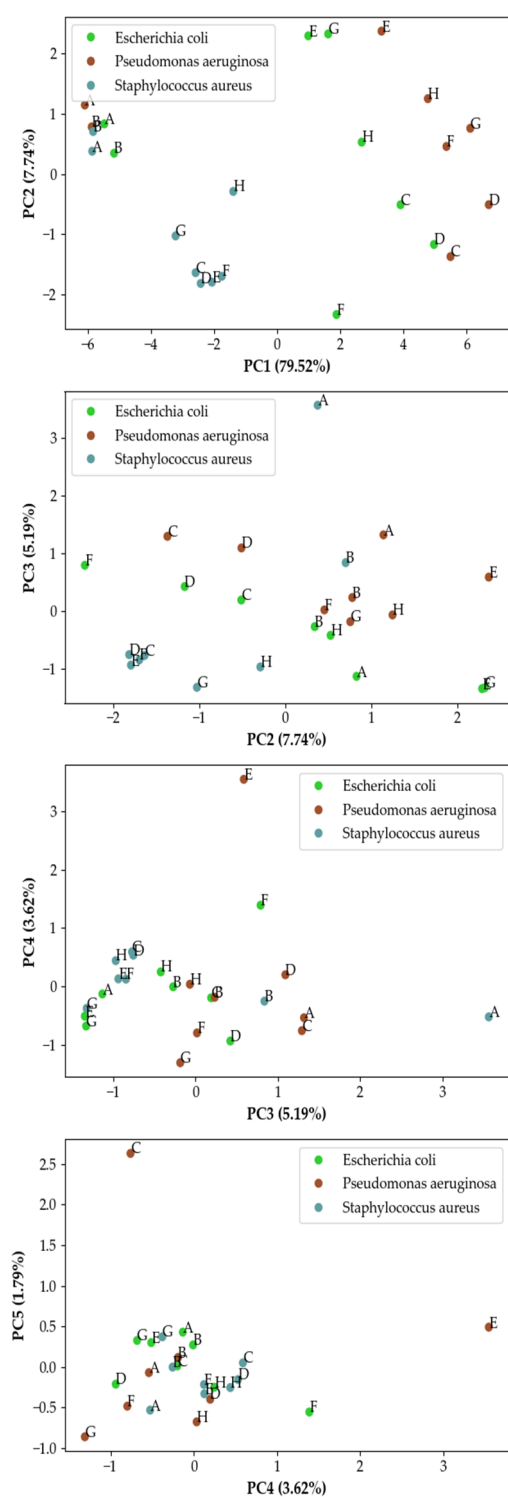

**Figure S6a.** PCA representation for the single wavelength measurements for SAg/AuNPs-WT

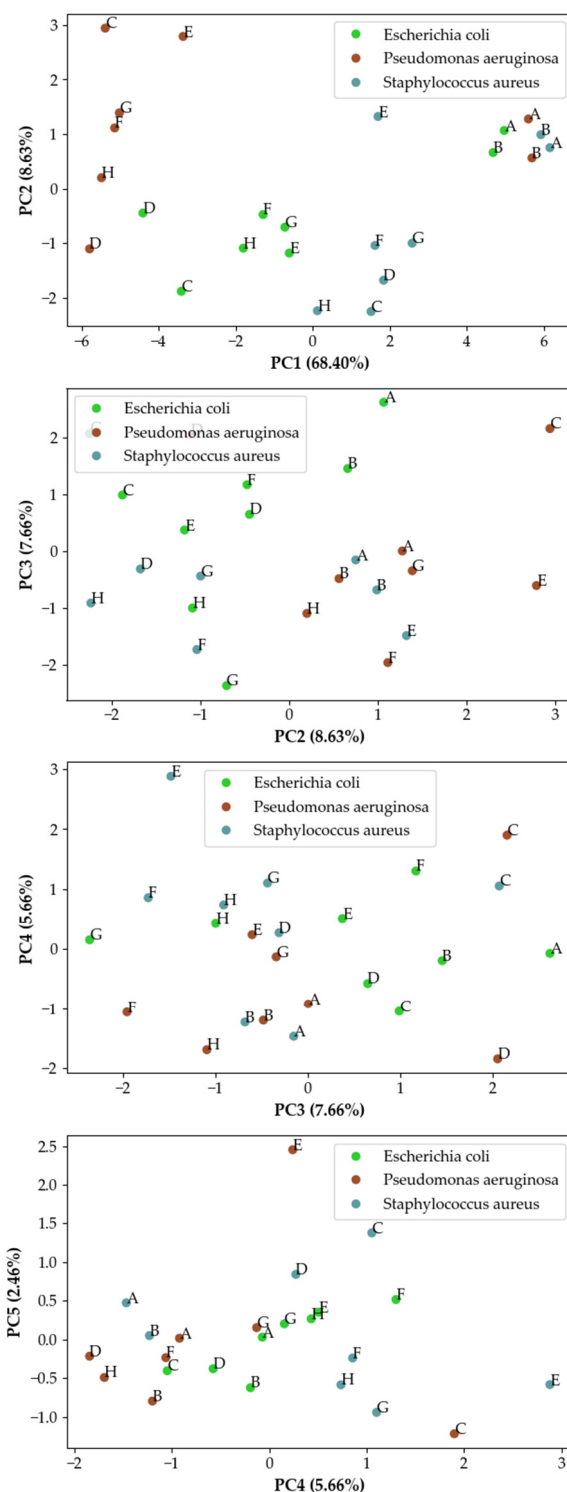

**Figure S6b.** PCA representation of the multi-wavelength measurements for SAg/AuNPs-WT

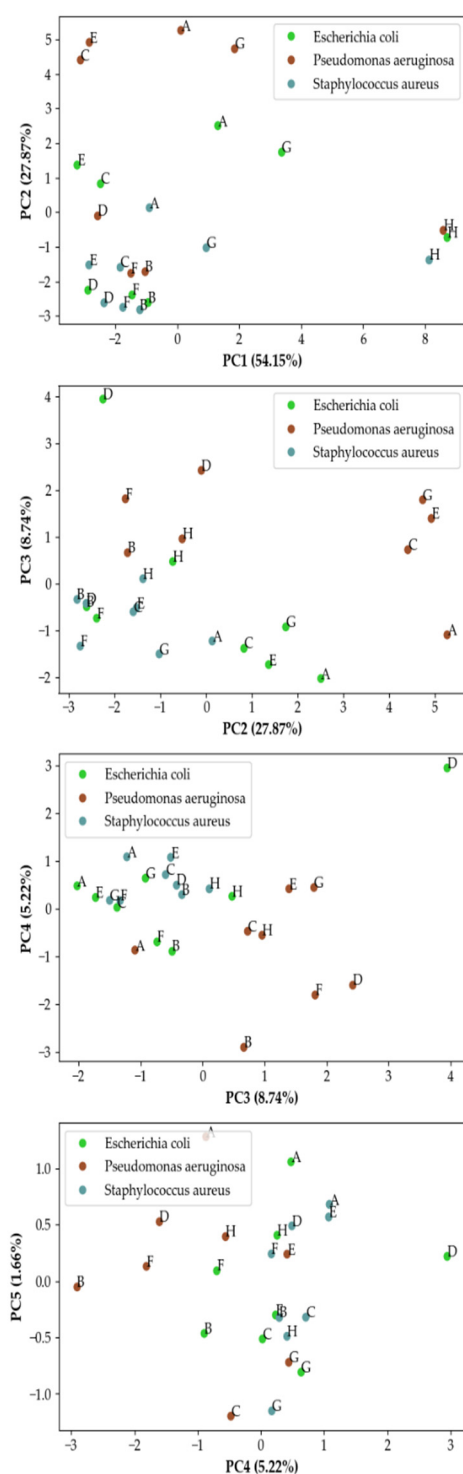

**Figure S7a.** PCA representation for the single wavelength measurements for hydrogels.

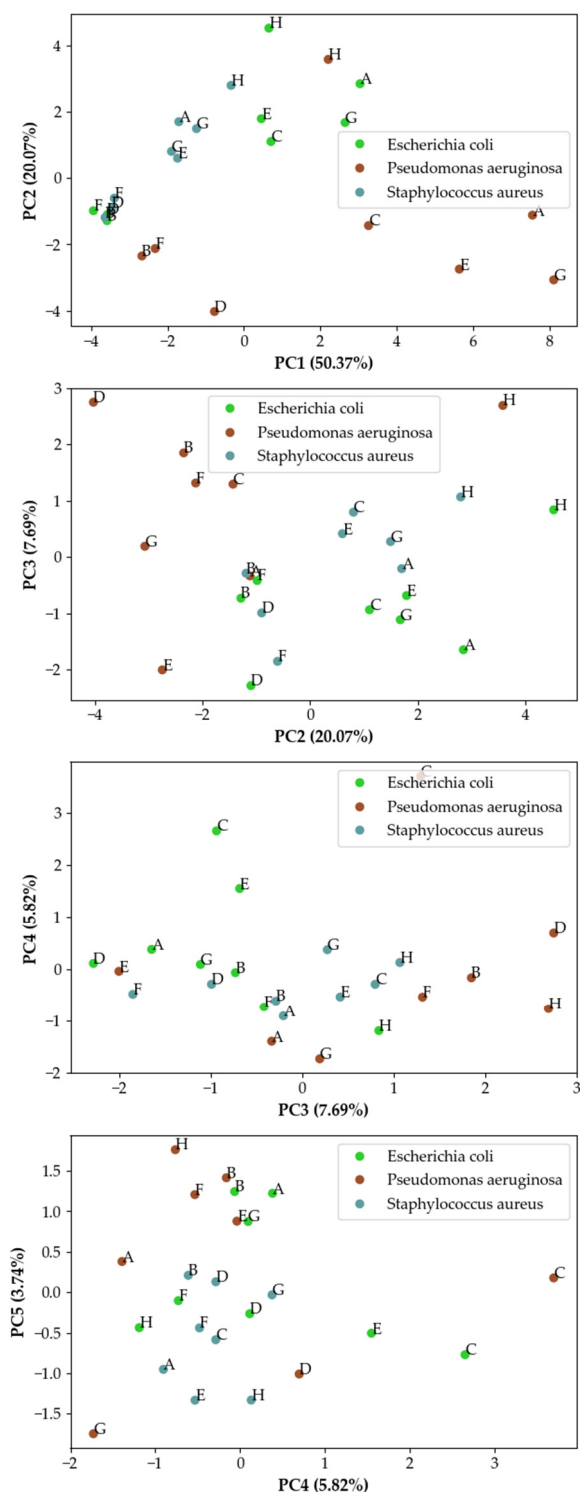

**Figure S7b.** PCA representation of the multi-wavelength measurements for hydrogels.

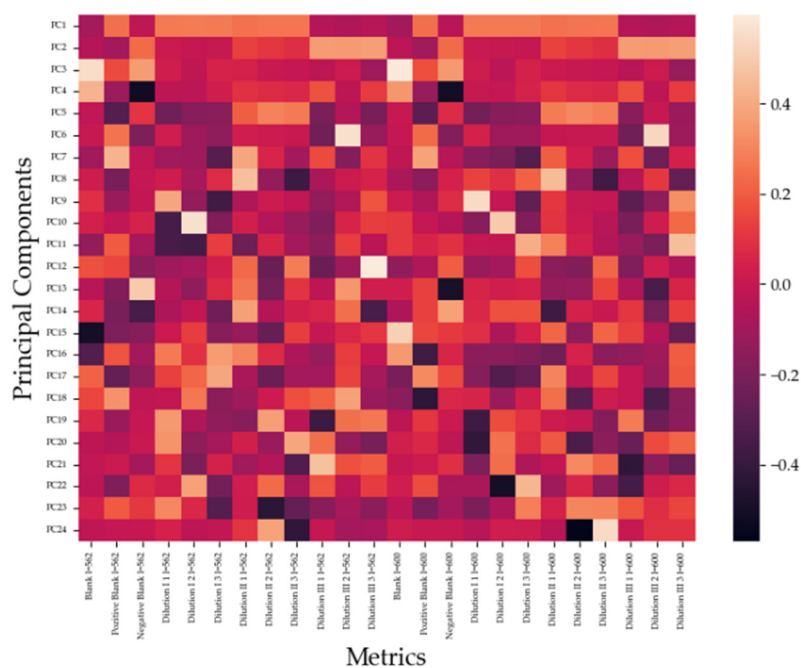

**Figure S8a.** Feature map for the single wavelength measurements for hydrogels.

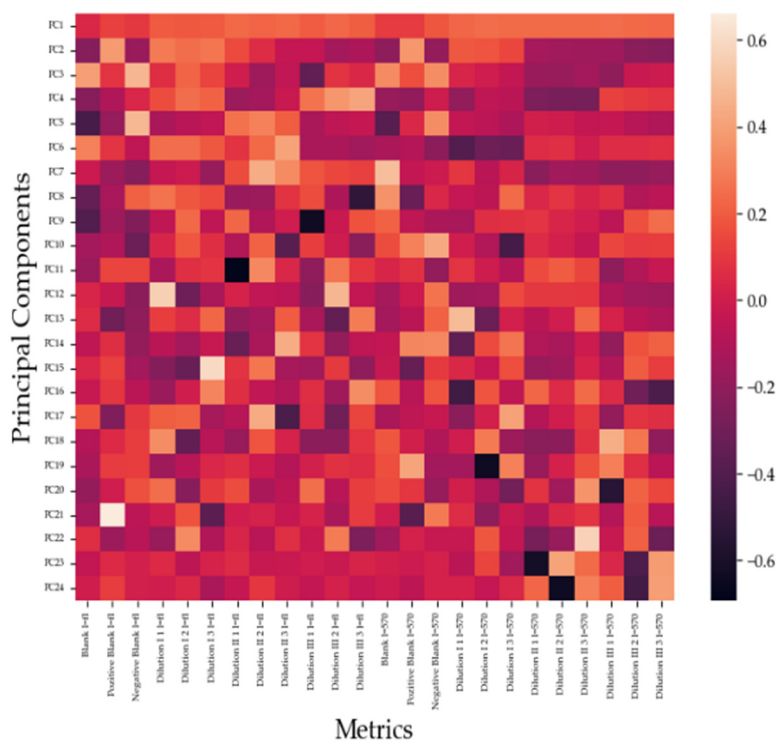

**Figure S8b.** Feature map for the multi-wavelength measurements for hydrogels.



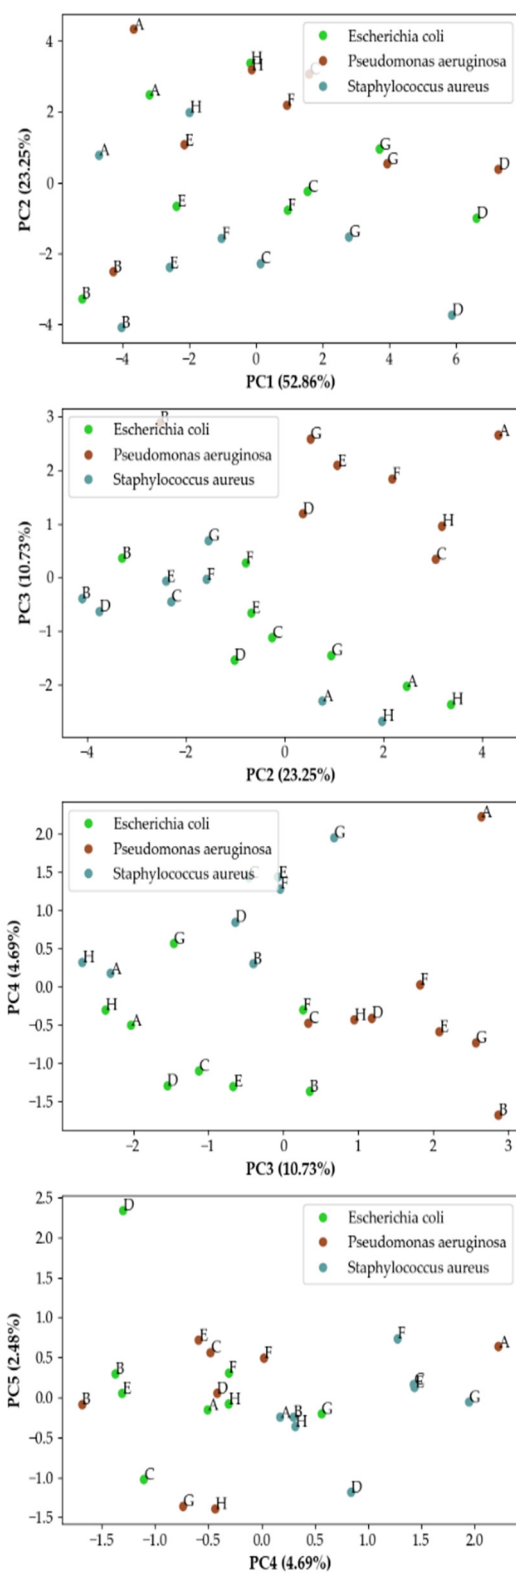

**Figure S9a.** PCA representation for the single wavelength measurements for ointments.

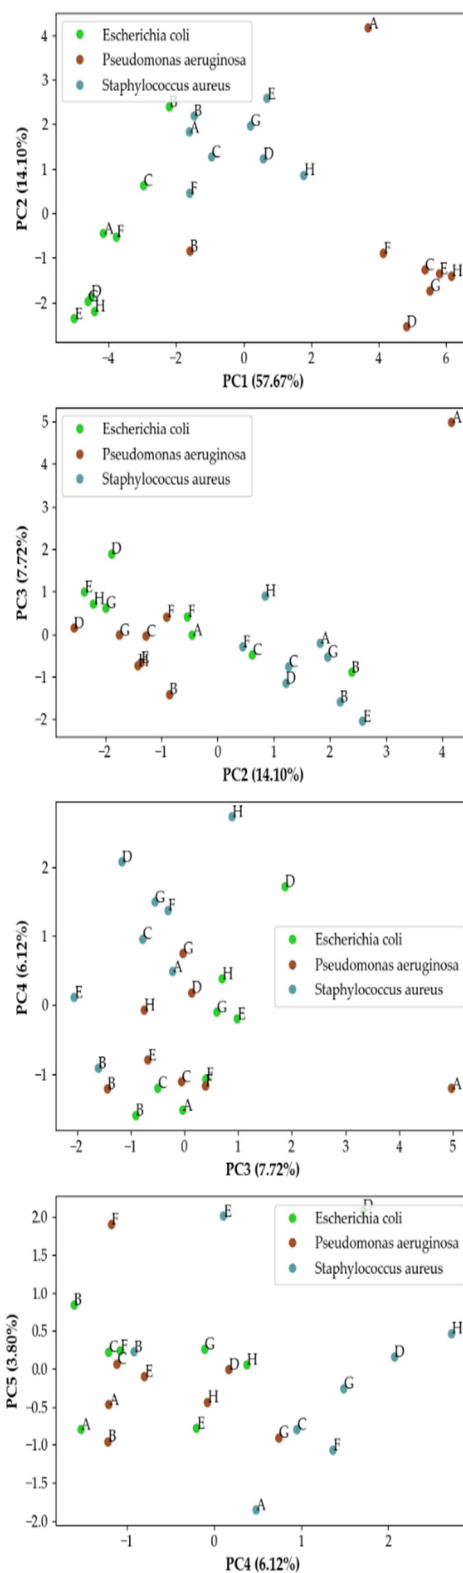

**Figure S9b.** PCA representation of the multi-wavelength measurements for ointments



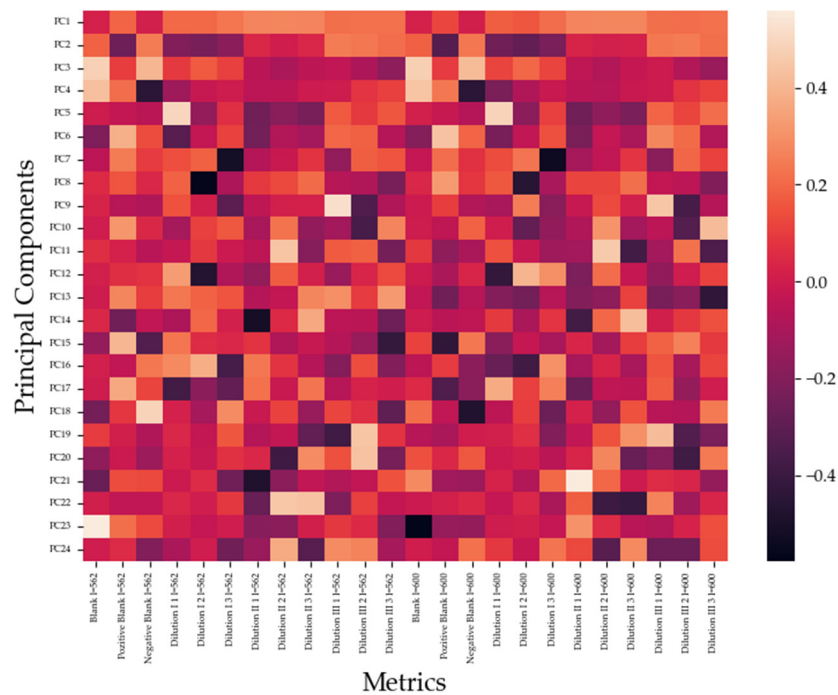

**Figure S10a.** Feature map for the single wavelength measurements for ointments.

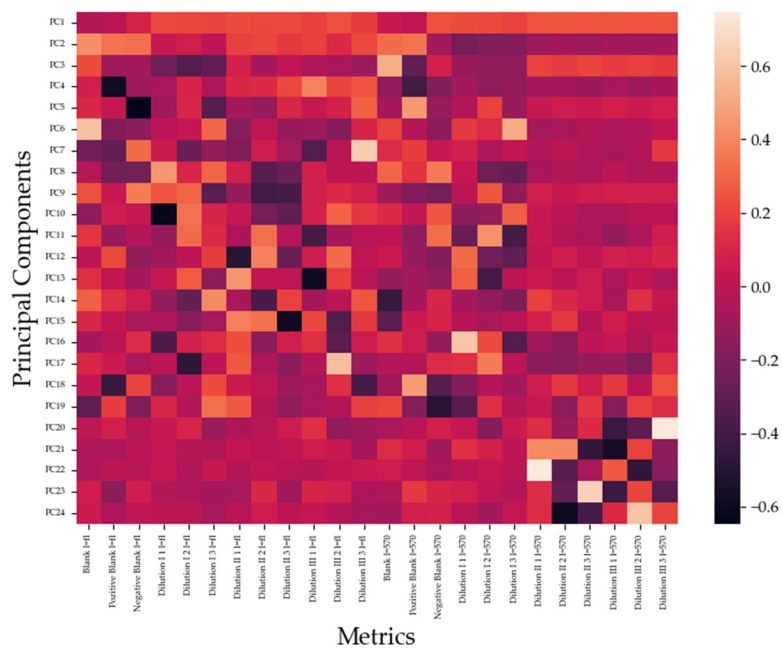

**Figure S10b.** Feature map for the multi-wavelength measurements for ointments.

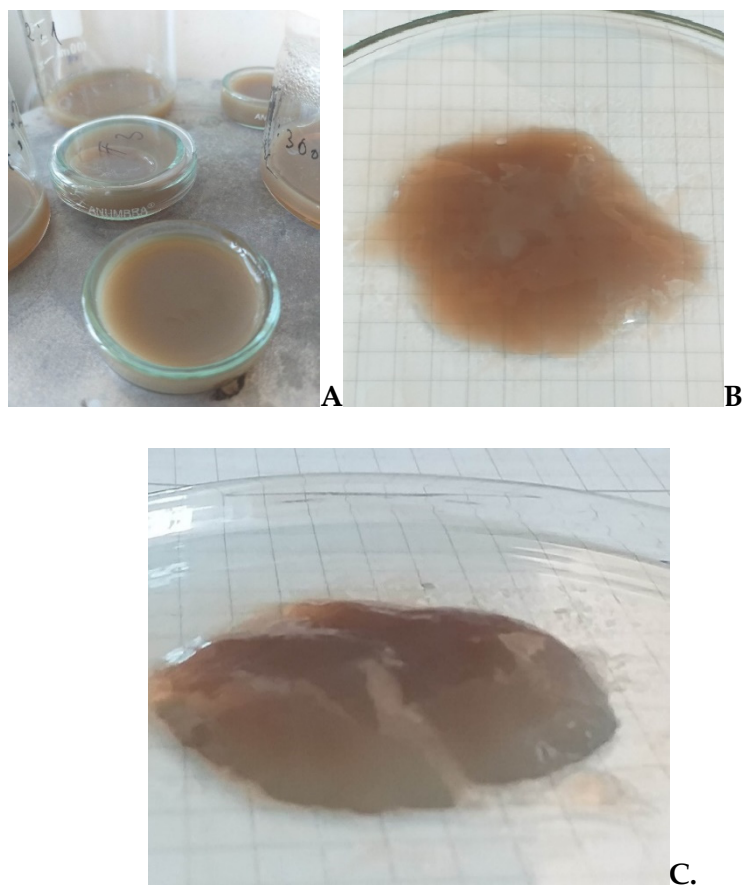

**Figure S11.** Hydrogels with: A. chitosan-gelatin-SAgNPs-WT volume ratio = 3:7 and 5 mL SAgNPs-WT; B. ratio = 5:5 (v/v) ; C. ratio= 1:9
